# Supplementary material for: The Epidemiological, Clinical, and Microbiological Features of Patients with Burkholderia pseudomallei Bacteraemia—Implications for Clinical Management
Source: MDPI journal article supplement (doi:10.3390/tropicalmed8110481), 2023-10-24
Supplement: s1 [file s1]

**Supplementary Table S1.** Correlation matrix showing associations between variables.

|                          | Male  | Immunosuppression | Wet season presentation | SSTI  | No risk factors | Age   | First Nations Australian | Remote residence | Diabetes mellitus | Hazardous alcohol use | Renal disease | Chronic lung disease | Malignancy | Lung involvement | GU involvement | MS involvement | CNS involvement |
|--------------------------|-------|-------------------|-------------------------|-------|-----------------|-------|--------------------------|------------------|-------------------|-----------------------|---------------|----------------------|------------|------------------|----------------|----------------|-----------------|
| Male                     | 1.00  | -                 | -                       | -     | -               | -     | -                        | -                | -                 | -                     | -             | -                    | -          | -                | -              | -              | -               |
| Immunosuppression        | 0.01  | 1.00              | -                       | -     | -               | -     | -                        | -                | -                 | -                     | -             | -                    | -          | -                | -              | -              | -               |
| Wet season presentation  | 0.01  | 0.04              | 1.00                    | -     | -               | -     | -                        | -                | -                 | -                     | -             | -                    | -          | -                | -              | -              | -               |
| SSTI                     | -0.12 | -0.10             | -0.10                   | 1.00  | -               | -     | -                        | -                | -                 | -                     | -             | -                    | -          | -                | -              | -              | -               |
| No risk factors          | -0.05 | -0.17             | 0.05                    | 0.21  | 1.00            | -     | -                        | -                | -                 | -                     | -             | -                    | -          | -                | -              | -              | -               |
| Age                      | 0.10  | 0.10              | -0.05                   | -0.22 | -0.28           | 1.00  | -                        | -                | -                 | -                     | -             | -                    | -          | -                | -              | -              | -               |
| First Nations Australian | -0.07 | -0.10             | -0.02                   | 0.01  | -0.14           | -0.39 | 1.00                     | -                | -                 | -                     | -             | -                    | -          | -                | -              | -              | -               |
| Remote residence         | 0.10  | -0.04             | 0.06                    | 0.05  | -0.12           | -0.14 | 0.33                     | 1.00             | -                 | -                     | -             | -                    | -          | -                | -              | -              | -               |
| Diabetes mellitus        | 0.01  | -0.20             | -0.08                   | -0.06 | -0.33           | 0.01  | 0.33                     | 0.15             | 1.00              | -                     | -             | -                    | -          | -                | -              | -              | -               |
| Hazardous alcohol use    | 0.18  | -0.06             | -0.06                   | -0.06 | -0.25           | -0.05 | 0.02                     | 0.12             | -0.13             | 1.00                  | -             | -                    | -          | -                | -              | -              | -               |
| Renal disease            | 0.07  | -0.06             | -0.06                   | -0.03 | -0.13           | 0.31  | 0.19                     | 0.02             | 0.17              | -0.02                 | 1.00          | -                    | -          | -                | -              | -              | -               |
| Chronic lung disease     | 0.01  | 0.04              | 0.00                    | -0.09 | -0.21           | 0.23  | -0.19                    | -0.14            | -0.19             | -0.04                 | -0.02         | 1.00                 | -          | -                | -              | -              | -               |
| Malignancy               | 0.05  | 0.44              | 0.02                    | -0.12 | -0.15           | 0.23  | -0.19                    | 0.09             | -0.18             | -0.10                 | 0.03          | 0.12                 | 1.00       | -                | -              | -              | -               |
| Lung involvement         | 0.13  | -0.02             | 0.17                    | -0.33 | -0.20           | 0.18  | 0.02                     | 0.05             | 0.01              | 0.06                  | 0.03          | 0.19                 | -0.03      | 1.00             | -              | -              | -               |
| GU involvement           | 0.19  | -0.10             | -0.05                   | -0.11 | -0.05           | -0.02 | -0.09                    | 0.05             | 0.18              | 0.18                  | 0.04          | 0.02                 | -0.08      | 0.01             | 1.00           | -              | -               |
| MS involvement           | 0.04  | 0.08              | -0.03                   | 0.26  | -0.04           | -0.03 | 0.07                     | 0.08             | 0.16              | -0.01                 | -0.04         | -0.01                | -0.07      | -0.03            | -0.03          | 1.00           | -               |
| CNS involvement          | 0.01  | -0.08             | -0.01                   | -0.02 | 0.10            | -0.02 | -0.11                    | 0.02             | -0.09             | 0.03                  | -0.01         | -0.02                | -0.07      | 0.05             | -0.09          | -0.01          | 1.00            |

SSTI: Skin or soft tissue infection; GU: Genitourinary; MS: musculoskeletal; CNS: Central nervous system
